# Supplementary material for: Basis for drug selectivity of plasmepsin IX and X inhibition for Plasmodium falciparum and vivax
Source: Research Square preprint supplement (doi:10.21203/rs.3.rs-944781/v2), 2021-10-07
Supplement: Supplementary file 1 [file a4eab8a6978ca1ea89a30030.pdf]

## **Basis for drug selectivity of plasmepsin IX and X inhibition for *Plasmodium falciparum* and *vivax***

Anthony N. Hodder<sup>1,2\*</sup>, Janni Christensen<sup>1,2\*</sup>, Stephen Scally<sup>1,2</sup>, Tony Triglia<sup>1</sup>, Anna Ngo<sup>1</sup>, Richard W. Birkinshaw<sup>1,2</sup>, Brodie Bailey<sup>1,2</sup>, Paola Favuzza<sup>1,2</sup>, Melanie H. Dietrich<sup>1,2</sup>, Wai-Hong Tham<sup>1,2</sup>, Peter E. Czabotar<sup>1,2</sup>, Kym Lowes<sup>1</sup>, Zhuyan Guo<sup>3</sup>, Nicholas Murgolo<sup>3</sup>, Manuel de Lera Ruiz<sup>3</sup>, John A. McCauley<sup>3</sup>, Brad E. Sleebs<sup>1,2</sup>, David Olsen<sup>3</sup>, Alan F. Cowman<sup>1,2,@</sup>

<sup>1</sup> The Walter and Eliza Hall Institute of Medical Research, Parkville 3052, Australia

<sup>2</sup> University of Melbourne, Melbourne 3010, Australia

<sup>3</sup> Merck & Co., Inc., 770 Sumneytown Pike, West Point, PA 19486, USA

\* These authors contributed equally to this work

@ Correspondence to [cowman@wehi.edu.au](mailto:cowman@wehi.edu.au)

Running title: Molecular mechanism of antimalarial inhibition for plasmepsin IX and X

Keywords: malaria, aspartic protease, antimalarial, plasmepsin IX, plasmepsin X

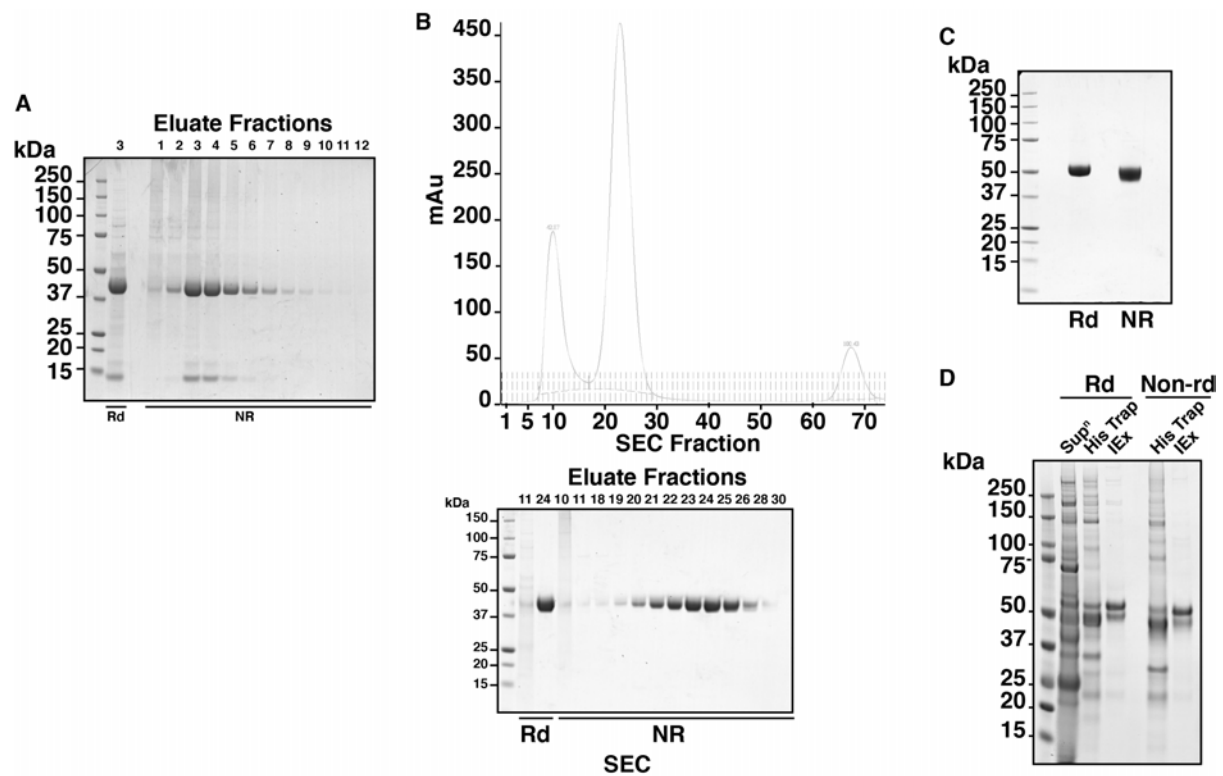

**Supplementary Figure 1. Expression and purification of active recombinant PvPMX and PfPMIX aspartic proteases.** **A.** PvPMX was expressed in insect cells and protein purified from supernatants using anti-FLAG M2-agarose. Shown is a Coomassie stained gel of eluted fractions. **B.** Pooled fractions were further purified by Size Exclusion Chromatography (SEC). **C.** Purified recombinant PvPMX run under reduced (Rd) and non-reduced (NR) conditions and visualized using Coomassie staining. **D.** Expression and purification of PfPMIX in CHO cells. Shown are proteins from insect cell supernatant (Sup<sup>n</sup>), protein purified by His-affinity chromatography (His Trap) and further purification using Ion Exchange Chromatography (IEX). Samples were run under reduced (Rd) and non-reduced (Non-rd) conditions and visualized by Coomassie staining.

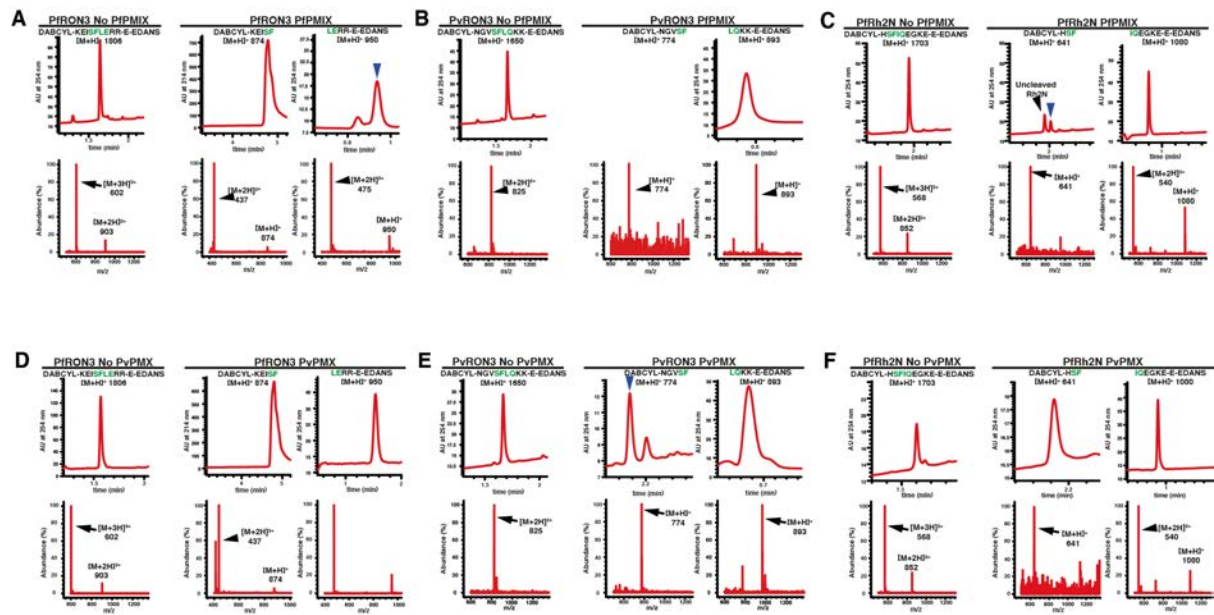

**Supplementary Figure 2. Mass spectrometry analysis of PfRON3 and PfRh2N peptides before and after cleavage with PvPMX or PfPMIX.** **A.** PfRON3 peptide (100  $\mu$ M) was incubated without and with recombinant PfPMIX (50 nM) and analysed by LC-ES/MS to identify the products. **B.** PvRON3 peptide (100  $\mu$ M) was incubated without and with recombinant PfPMIX (50 nM) and analysed by LC-ES/MS to identify the molecular species present. The N-terminal fragment could not be detected by HPLC but was identified by mass spectrometry. **C.** PfRh2N peptide (100  $\mu$ M) was incubated without and with recombinant PfPMIX (50 nM) and analysed by LC-ES/MS to identify the molecular species present. For all fluorogenic peptides (PfRON3, PvRON3 and Rh2N) cleavage by PfPMIX occurs on the C-terminal side of the phenylalanine (F). Blue arrows indicate the cleavage product. **D.** PfRON3 peptide (100  $\mu$ M) was incubated without and with recombinant PvPMX (50 nM) and analysed by LC-ES/MS to identify the products. **E.** PvRON3 peptide (100  $\mu$ M) was incubated without and with recombinant PvPMX (50 nM) and analysed by LC-ES/MS to identify the molecular species present. **F.** PfRh2N peptide (100  $\mu$ M) was incubated without and with recombinant PvPMX (50 nM) and analysed by LC-ES/MS to identify the molecular species present. For all fluorogenic peptides (PfRON3, PvRON3 and Rh2N) cleavage by PvPMX occurs on the C-terminal side of the phenylalanine (F). Blue arrows indicate the cleavage product.

## A

```

PfPMX 1  ---MKKIS-----PLNLFYSLFFSTFRLKTRLYK-----IGKAL
PvPMX 1  ---MKHMG-----GFRFLCGALFLDFWGBATGKRYK-----VGEPI
PfPMIX 1  MFFINFKKIKKQFPPIYLQHRITITVELFHYFINLKDFFHN-NSRILSDWKHRLGY
PvPMIX 1  MPPNRKIKKISLLSTLIHFPAPLLEVHLFLRQSSCLFSAFPRFADITWEEENL

PfPMX 38  PCSSEIVFTQIGCLPEEKSSHVIFPKLNKKNNDKKLOKHHESI---KLGSVKYYYN
PvPMX 38  PCSQCHVRECSACLFEEQSPHAIHFKLNKKKSDSNKKHHESI---KLGSVKYYVK
PfPMIX 60  NIPKENVCHKCSITHENGSAQNVIPVAIPS---KRRKCDINKEREEN---
PvPMIX 61  EIPTDADCVCSVTHKKAASENLIIPMAIPS---KRRKCDYKIGKINSELDNPTKKL

PfPMX 95  RGEGISGSLGTSSNTLDDMLINEEINKKRTNAQLEKNFLFTTNKKNKAQDLSHLS
PvPMX 95  RGEGISGSLGNPSCNTLDDTISINEEIRIRIESAGVGNAPVYANGGSGP---DRFA
PfPMIX 107  ---KYFHLITFEK---DIYNNKINNVKKELIYKLKKK-----KOKKNCIN
PvPMIX 118  KKKKKKSYSPFEK---EEEGRESENEQDFKQFEESDPP-----SDATDNHLS

PfPMX 155  DQKHVVEQDAQKGNKNTNNENDSDNENDSDNENSDNENNLDN-ENLDNENDSDSS
PvPMX 152  GVCCHHAFAC-----GVSF-DMASGQSGSDIA
PfPMIX 147  FIERKDTGLSPSHDKRTHIN-----HM-----NK--IKDEKVKQYEEEEKIYNTNLS
PvPMIX 169  HNKRTTIVGSELHHPTEFNVCVNSDCIM-----SNBASAPVYLQFMNGSGEAKARA-CH

PfPMX 214  IEKNE---LAEKNNAIVEOTDENFLPLKHLRDSQVGTLLGTFPPQTIPIFDTGST
PvPMX 179  KGESF---LDKNNNAIVEOTDENFLPLKHLRDSQVGTLLGTFPPQTIPIFDTGST
PfPMIX 195  DEKN---EINNECNLNLINNDKVTLPLQQLDSDQVGYQLGTFPPQTIPIFDTGST
PvPMIX 223  KRSNLSNWNWSGAPKKKLVSTQVTLPLQQLDSDQVGYQLGTFPPQTIPIFDTGST

PfPMX 271  NWWVVTACEESCKKVRRYLNNKSKIFRRSIEKNLHIVFGSGSTSSVCHTFMCKKH
PvPMX 236  NWWVVTACEESCKKVRRYLNNKSKIFRRSIEKNLHIVFGSGSTSSVCHTFMCKKH
PfPMIX 251  NIWVVTCKQDETLKVHRYNKKLSSEFYYEFHNLDIMFGTGLIAGVIGVETFKIGGF
PvPMIX 283  NIWVVTCKQDETLKVHRYNKKLSSEFYYEFHNLDIMFGTGLIAGVIGVETFKIGGF

PfPMX 331  LVRNQTFLVSESSNNKNGGDNIFYISFEGIVGLFFPEMLSAENIPFDNLKKNPV
PvPMX 296  TVRNQTFLVSESSNDL-NGDNIFYISFEGIVGLFFPEMLSAENIPFDNLKKNPV
PfPMIX 311  EIKNCSFGLVKREKAS--DNKSNVFRINFEFIVGLAFPEMLSTGKSTLYBNLSSYKLG
PvPMIX 343  KVENCFEGLVKREKRS--DAKSNVFRINFEFIVGLAFPEMLSTGKSTLYBNLNTYKFS

PfPMX 391  DPQSFSPYISPYCKSTLIFGLSKSFEGDIYMFVVKESYWEKLFELYIGKEHCCDE
PvPMX 355  SPQSFSPYISPYNTSTLIFGVSKSFEGDIYMFVVKESYWEKLFELYIGKEHCCDE
PfPMIX 369  HNEFSIYIGKSKYSALIFGGVGRFEGDIYMFVVKESYWEKLFELYIGKEHCCGV
PvPMIX 401  HNEFSIYIGKSKYSALIFGGVGRFEGDIYMFVVKESYWEKLFELYIGKEHCCGS

PfPMX 451  -----
PvPMX 415  -----
PfPMIX 429  NSIYVDLKKKQDEN--NKLFTKKYFKNKFKTHIRN-ILL-----
PvPMIX 461  SSIYVDLKKKKKKWKVDENSEARKYLAKKTDLRDLSVQHHRREGAEEDSEEDPSGENL

PfPMX 451  -----
PvPMX 415  -----
PfPMIX 467  -----KQIKQKQKQKHSNHKKKKL
PvPMIX 521  SGESLSGEKDHGERSTGGEVNPYGAHPERRKGGAHRRRRRRRERERHRSRVNRRGDKKL

PfPMX 451  ---ESYLIIFDGTSTNNMPSQKQKFLNLHSTACTQNYKDIKSYFLIKVFGELIIE
PvPMX 415  ---ESYLIIFDGTSTNNMPSAQKQFENVVPSADTSENYCEVKNYFVKHFGDIVIE
PfPMIX 486  NKKKNYLIFDGTSTNSVPKDEIDFFENVVPSKKCDUSRIEIVSSYPNLYVINKNFT
PvPMIX 581  KKNQNYLIFDGTSTNSVPKSELGYFFENVVPSKKCDUSNIDEVVASYPNLYVINNFET

PfPMX 508  LIPPEYIMLNDCMPAYQIIVSEKHNHAYLGSLFMRNSETVVRGTESRPSVVGVA
PvPMX 472  LIPPEYIMLNESCLPAYQIIVSEKHNHAYLGSLAFMRHYTYTVRGASQPSVVGVA
PfPMIX 546  LTFQCYLVKKNDMCKPAEMELIVSSEYCHAYLGNAFMRYYYTVVRGNNNNSVVGVA
PvPMIX 641  LTFQCYLVKKSMDCKPAEMELIVSSEYCHAYLGNAFMRYYYTVVRGDRKCSVVGVA

PfPMX 568  KAKSKN-----
PvPMX 532  KARAAFAAAQKIAE-----
PfPMIX 606  KAVHDEENKYLESHNKNNNI-
PvPMIX 701  KAVHAEINBEYLIALQRKNNPVG

```

## B

## Percent Identity Matrix

|           |        |        |        |        |
|-----------|--------|--------|--------|--------|
| 1: PfPMX  | 100.00 | 63.13  | 34.73  | 34.00  |
| 2: PvPMX  | 63.13  | 100.00 | 34.84  | 35.47  |
| 3: PfPMIX | 34.73  | 34.84  | 100.00 | 56.87  |
| 4: PvPMIX | 34.00  | 35.47  | 56.87  | 100.00 |

**Supplementary Figure 3. Comparison of the protein sequence for PfPMX, PvPMX, PfPMIX and PvPMIX and determination of the percent identity. A.** Comparison of the protein sequence for PfPMX, PvPMX, PfPMIX and PvPMIX with identical residues shaded in

black. Amino acid positions are numbered at the left. **B.** Percent identity matrix of for PfPMX, PvPMX, PfPMIX and PvPMIX. PlasmoDB and Genbank Database Sequence Accessions: PfPMX PF3D7\_0808200, CAD51290.1; PvPMX PVP01\_0112200, VUZ93138.1; PfPMIX PF3D7\_1430200, CZT99999.1; PvPMIX PVP01\_1319200, VUZ98253.1.

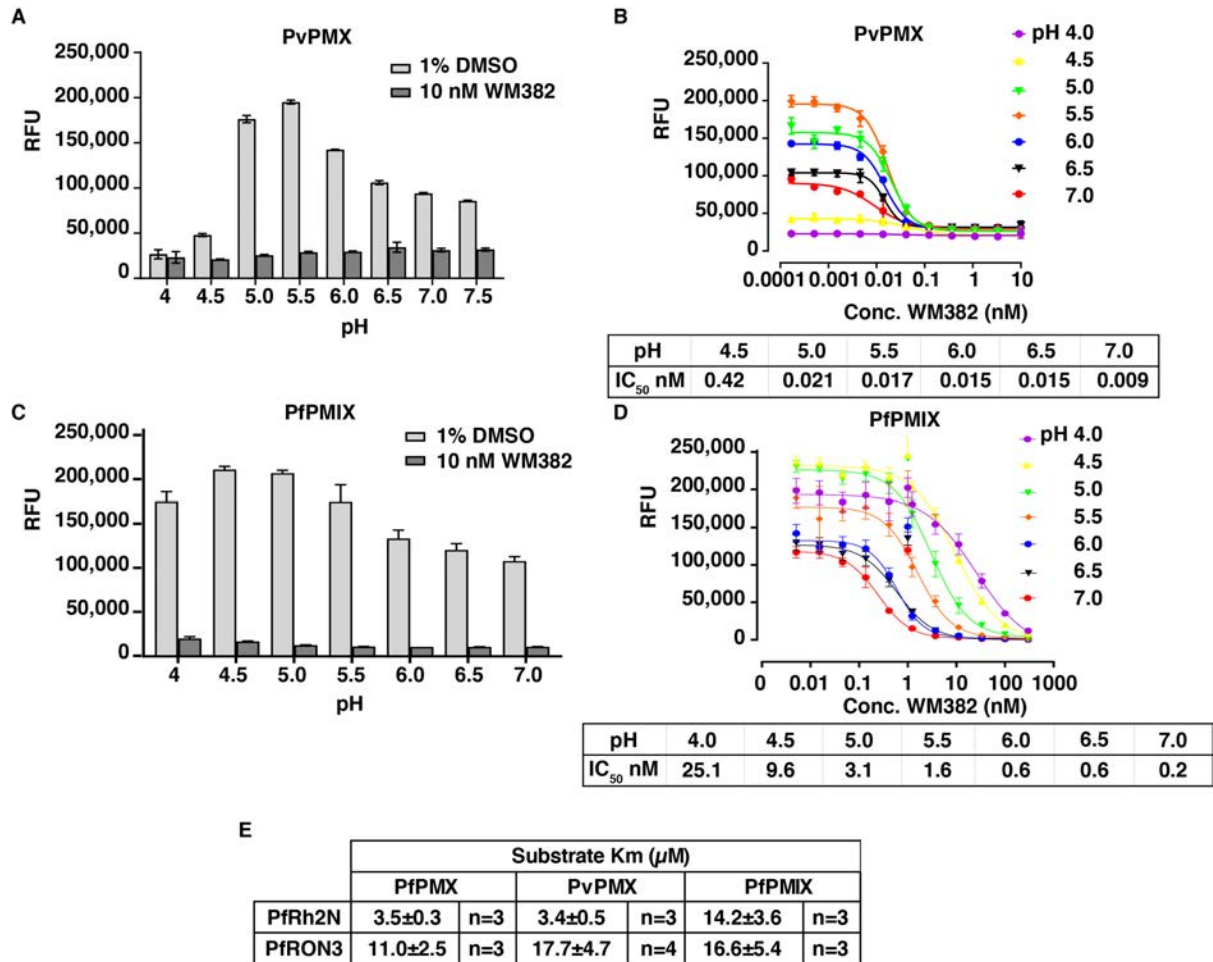

**Supplementary Figure 4. Recombinant PvPMX and PfPMIX aspartic proteases are enzymatically active.** **A.** Cleavage activity of PvPMX with the PfRh2N fluorogenic peptide at different pH and inhibition with WM382. **B.** Determination of the IC<sub>50</sub> for inhibition of PvPMX with WM382 and cleavage of the PfRh2N peptide. **C.** Cleavage activity of PfPMIX with the PfRON3 fluorogenic peptide at different pH and inhibition with WM382. **D.** Determination of the IC<sub>50</sub> for inhibition of PfPMIX with WM382 and cleavage of the PfRON3 peptide. **E.** K<sub>m</sub> for PfPMIX, PvPMX and PfPMIX using peptide substrates PfRh2N and PfRON3 as indicated.

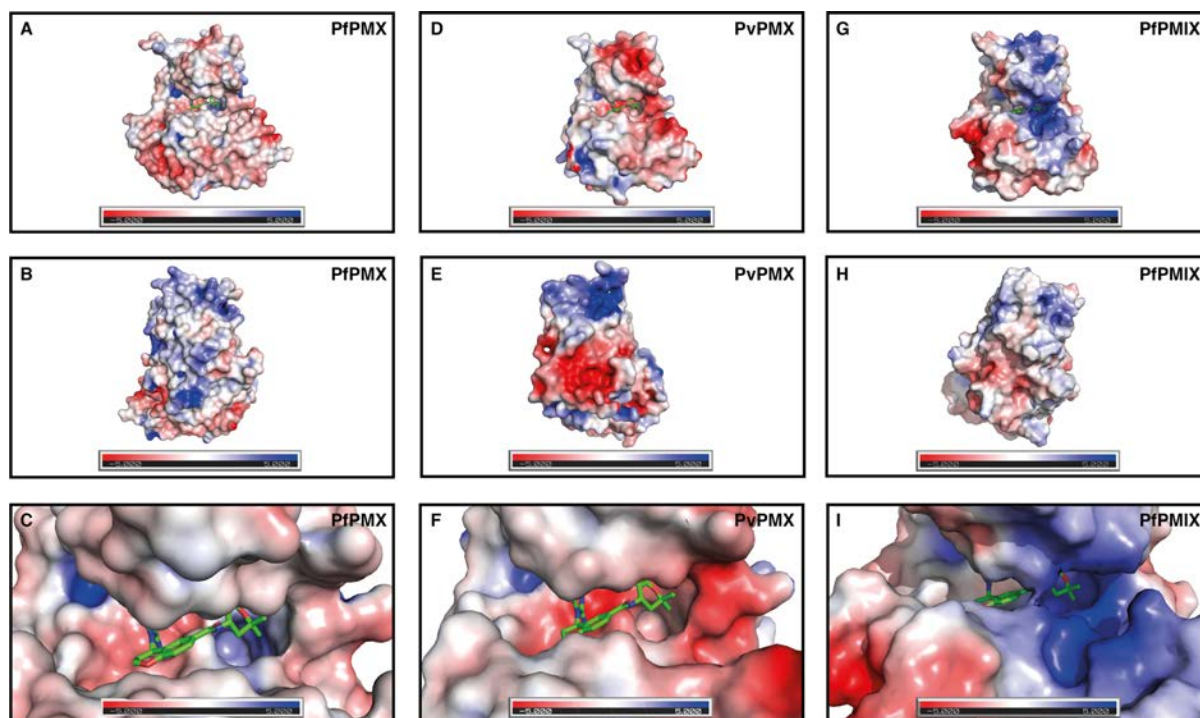

**Supplementary Figure 5. Surface charge distribution for PfPMX, PvPMX and PfPMIX and binding of WM382 to the active site (red positive and blue negative charge). A.** Surface charge distribution of a front view of PfPMX. **B.** Surface charge distribution for the back view of PfPMX. **C.** Surface charge distribution of the active site of PfPMX with WM382 bound. **D.** Surface charge distribution of a front view of PvPMX. **E.** Surface charge distribution for the back view of PvPMX. **F.** Surface charge distribution of the active site of PvPMX with WM382 bound. **G.** Surface charge distribution of a front view of PfPMIX. **H.** Surface charge distribution for the back view of PfPMIX. **I.** Surface charge distribution of the active site of PfPMIX with WM382 bound. For all panels electrostatic calculations were performed using Adaptive Poisson-Boltzmann Solver <sup>30</sup> and rendered in PyMOL (The PyMOL Molecular Graphics System, Version 2.0; Schrödinger, LLC); scale:  $-5$  kT/e (red) to  $+5$  kT/e (blue).



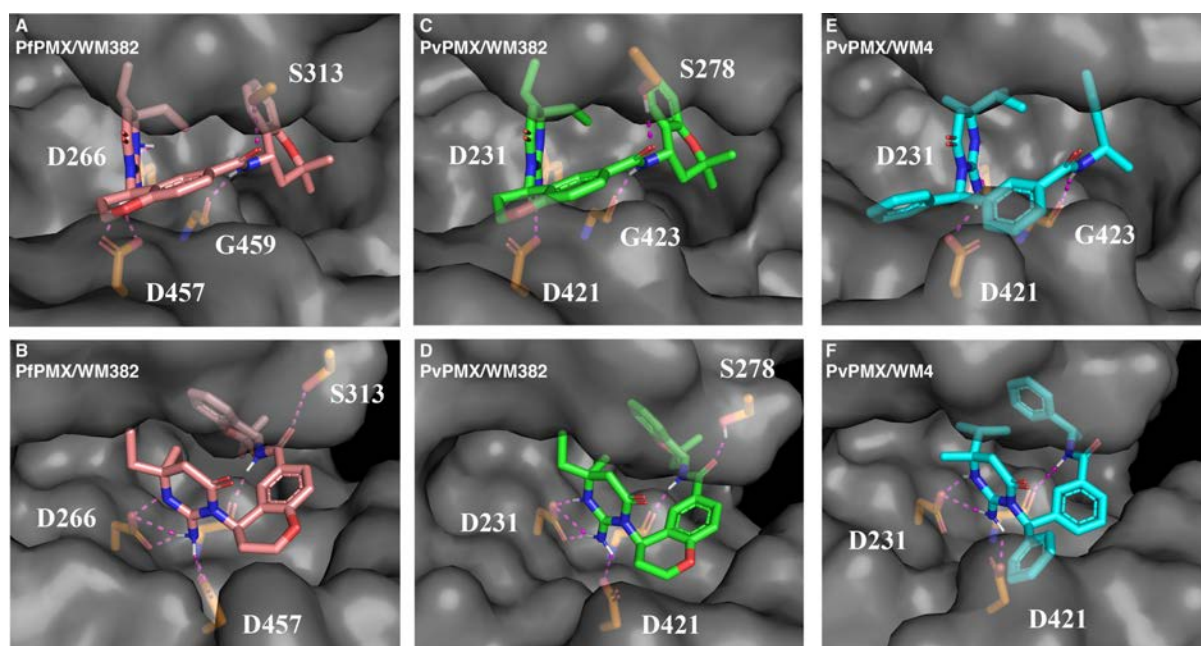

**Supplementary Figure 6.** Surface view of the active site of PfPMX, PvPMX showing the hydrogen bonds to WM382 or WM4 that have bound to the active site. **A and B.** Different views for the interaction of WM382 with the active site of PfPMX. **C and D.** Different views for the interaction of WM382 with the active site of PvPMX. **E and F.** Different views for the interaction of WM4 with the active site of PvPMX.



**Supplementary Table 1. SPR kinetic parameters for WM4 against PvPMX, PfPMX and PfPMIX.**

| Ligand | Analyte | Values               | $k_{on}$ ( $M^{-1}s^{-1}$ )            | $k_{off}$ ( $s^{-1}$ )                      | $K_D$ (M)                                     | $R_{max}$ (RU) | $\chi^2$ (RU <sup>2</sup> ) |
|--------|---------|----------------------|----------------------------------------|---------------------------------------------|-----------------------------------------------|----------------|-----------------------------|
| PvPMX  | WM4     | independent repeat 1 | $3.88 \times 10^6$                     | $2.19 \times 10^{-3}$                       | $5.64 \times 10^{-10}$                        | 8.5            | 0.014                       |
| PvPMX  | WM4     | independent repeat 2 | $1.38 \times 10^7$                     | $5.67 \times 10^{-3}$                       | $4.11 \times 10^{-10}$                        | 36.2           | 0.050                       |
| PvPMX  | WM4     | independent repeat 3 | $5.01 \times 10^6$                     | $2.27 \times 10^{-3}$                       | $4.52 \times 10^{-10}$                        | 15.5           | 0.024                       |
| PvPMX  | WM4     | mean $\pm$ SD        | $7.6 \times 10^6 \pm 5.4 \times 10^6$  | $3.4 \times 10^{-3} \pm 2 \times 10^{-3}$   | $4.8 \times 10^{-10} \pm 8 \times 10^{-11}$   | N/A            | N/A                         |
| PfPMX  | WM4     | independent repeat 1 | $7.81 \times 10^6$                     | $2.36 \times 10^{-3}$                       | $3.03 \times 10^{-10}$                        | 4.0            | 0.036                       |
| PfPMX  | WM4     | independent repeat 2 | $7.44 \times 10^6$                     | $3.25 \times 10^{-3}$                       | $4.10 \times 10^{-10}$                        | 4.6            | 0.021                       |
| PfPMX  | WM4     | independent repeat 3 | $3.63 \times 10^6$                     | $1.62 \times 10^{-3}$                       | $4.45 \times 10^{-10}$                        | 2.3            | 0.023                       |
| PfPMX  | WM4     | mean $\pm$ SD        | $6.3 \times 10^6 \pm 2.31 \times 10^6$ | $2.4 \times 10^{-3} \pm 8.2 \times 10^{-4}$ | $3.9 \times 10^{-10} \pm 7.4 \times 10^{-11}$ | N/A            | N/A                         |
| PfPMIX | WM4     | independent repeat 1 | $9.62 \times 10^5$                     | $8.12 \times 10^{-2}$                       | $8.45 \times 10^{-7}$                         | 79.4           | 1.98                        |
| PfPMIX | WM4     | independent repeat 2 | $4.23 \times 10^5$                     | $2.61 \times 10^{-2}$                       | $6.17 \times 10^{-8}$                         | 74.9           | 0.30                        |
| PfPMIX | WM4     | independent repeat 3 | $4.16 \times 10^5$                     | $3.49 \times 10^{-2}$                       | $8.38 \times 10^{-8}$                         | 76.6           | 0.07                        |
| PfPMIX | WM4     | mean $\pm$ SD        | $6.0 \times 10^5 \pm 3.1 \times 10^5$  | $4.7 \times 10^{-2} \pm 3 \times 10^{-2}$   | $7.7 \times 10^{-8} \pm 1.3 \times 10^{-8}$   | N/A            | N/A                         |

**Supplementary Table 2. Data collection and refinement statistics for 3-D crystal structures for PfPMX-apo, PfPMX-WM382, PvPMX-WM382 and PvPMX-WM4.**

|                                                                    | PfPMX-apo             | PfPMX-WM382            | PvPMX-WM382           | PvPMX-WM4             |
|--------------------------------------------------------------------|-----------------------|------------------------|-----------------------|-----------------------|
| <b>Beamline</b>                                                    | MX2                   | MX2                    | MX2                   | MX2                   |
| <b>Wavelength (Å)</b>                                              | 0.953649              | 0.95373                | 0.953732              | 0.953651              |
| <b>Space group</b>                                                 | P 21 21 21            | P 31 2 1               | I 2 2 2               | C 2 2 21              |
| <b>Cell dimensions</b>                                             |                       |                        |                       |                       |
| <i>a, b, c</i> (Å)                                                 | 62.3, 63.2, 79.3      | 109.3, 109.3, 118.3    | 82.0, 88.4, 230.2     | 80.5, 253.3, 171.8    |
| <i>α, β, γ</i> (°)                                                 | 90, 90, 90            | 90, 90, 120            | 90, 90, 90            | 90, 90, 90            |
| <b>Resolution (Å)<sup>a</sup></b>                                  | 33.46-1.85(1.92-1.85) | 49.63-2.76 (2.91-2.76) | 38.63-2.22(2.29-2.22) | 39.12-3.35(3.58-3.35) |
| <b>No. molecules in ASU</b>                                        | 1                     | 1                      | 2                     | 4                     |
| <b>No. observations</b>                                            | 363,720 (35,939)      | 481,905 (18,533)       | 575,629 (54,084)      | 175,235 (31,403)      |
| <b>No. unique observations</b>                                     | 27,357 (2,688)        | 21,289 (2,860)         | 41,807 (3,792)        | 25,719 (4,587)        |
| <b>Multiplicity</b>                                                | 13.3 (13.4)           | 22.6 (6.5)             | 13.8 (14.3)           | 6.8 (6.8)             |
| <b>R<sub>merge</sub> (%)<sup>b</sup></b>                           | 10.2 (144.1)          | 14.8 (120.9)           | 17.0 (174.0)          | 40.9 (120.8)          |
| <b>R<sub>pim</sub> (%)<sup>c</sup></b>                             | 2.9 (40.6)            | 3.0 (49.6)             | 4.7 (47.3)            | 16.8 (49.6)           |
| <b>&lt;I/σ I&gt;</b>                                               | 15.71 (1.43)          | 12.5 (1.2)             | 11.4 (1.7)            | 5.0 (1.9)             |
| <b>CC<sub>½</sub></b>                                              | 100.0 (78.8)          | 99.9 (60.8)            | 99.8 (80.7)           | 97.5 (72.1)           |
| <b>Completeness (%)</b>                                            | 99.9 (99.9)           | 99.0 (93.6)            | 100 (100)             | 99.9 (99.9)           |
| <b>Refinement Statistics</b>                                       |                       |                        |                       |                       |
| <b>Reflections (work)</b>                                          | 27,333                | 21,253                 | 41,778                | 25,684                |
| <b>Reflections (test)</b>                                          | 1,995                 | 1,061                  | 4,099                 | 1,286                 |
| <b>Non-hydrogen atoms</b>                                          | 2,831                 | 2,790                  | 5,770                 | 11,048                |
| <b>Macromolecule</b>                                               | 2,614                 | 2,649                  | 5,386                 | 10,721                |
| <b>Water</b>                                                       | 165                   | 9                      | 231                   | 83                    |
| <b>Heteroatom</b>                                                  | 52                    | 132                    | 153                   | 244                   |
| <b>R<sub>work</sub><sup>d</sup> / R<sub>free</sub><sup>e</sup></b> | 20.5/25.8             | 19.7/22.3              | 20.2/25.9             | 23.3/28.9             |
| <b>Rms deviations from ideality</b>                                |                       |                        |                       |                       |
| <b>Bond lengths (Å)</b>                                            | 0.007                 | 0.009                  | 0.008                 | 0.003                 |
| <b>Bond angle (°)</b>                                              | 0.84                  | 1.00                   | 0.92                  | 0.63                  |
| <b>Ramachandran plot</b>                                           |                       |                        |                       |                       |
| <b>Favoured regions (%)</b>                                        | 95.7                  | 94.3                   | 96.0                  | 94.2                  |
| <b>Allowed regions (%)</b>                                         | 4.0                   | 4.8                    | 0.6                   | 0.6                   |
| <b>B-factors (Å<sup>2</sup>)</b>                                   |                       |                        |                       |                       |
| <b>Wilson B-value</b>                                              | 30.9                  | 96.2                   | 41.0                  | 58.5                  |
| <b>Average B-factors</b>                                           | 40.2                  | 92.2                   | 45.6                  | 52.1                  |
| <b>Average macromolecule</b>                                       | 39.6                  | 91.9                   | 45.2                  | 52.1                  |
| <b>Average heteroatom</b>                                          | 59.1                  | 99.8                   | 54.7                  | 55.3                  |
| <b>Average water molecule</b>                                      | 44.3                  | 88.6                   | 48.7                  | 33.4                  |

<sup>a</sup> Values in parentheses refer to the highest resolution bin.

<sup>b</sup>  $R_{\text{merge}} = \sum_{\text{hkl}} \sum_i |I_{\text{hkl},i} - \langle I_{\text{hkl}} \rangle| / \sum_{\text{hkl}} \langle I_{\text{hkl}} \rangle$

<sup>c</sup>  $R_{\text{pim}} = \sum_{\text{hkl}} [1/(N-1)]^{1/2} \sum_i |I_{\text{hkl},i} - \langle I_{\text{hkl}} \rangle| / \sum_{\text{hkl}} \langle I_{\text{hkl}} \rangle$

<sup>d</sup>  $R_{\text{work}} = (\sum | |F_o| - |F_c| |) / (\sum |F_o|)$  - for all data except as indicated in footnote e.

<sup>e</sup> 5% of data were used for the  $R_{\text{free}}$  calculation

**Supplementary Table 3. Hydrogen bonding interactions between residues of the flap located within the S3 subpocket of PMX.**

| Protease/drug | #1                         | #2                                       | #3                                       | #4                                       | #5                                       | #6                                       | #7                                       | #8                                       |
|---------------|----------------------------|------------------------------------------|------------------------------------------|------------------------------------------|------------------------------------------|------------------------------------------|------------------------------------------|------------------------------------------|
| PfPMX         | Q247<br>D245 <sup>MC</sup> | Q247 <sup>MA</sup><br>D245 <sup>MC</sup> | Q247 <sup>MA</sup><br>L243 <sup>MA</sup> | Nil                                      | Nil                                      | Nil                                      | Nil                                      | Nil                                      |
| PfPMX/WM382   | Q247 <sup>MC</sup><br>S359 | Q247<br>D245                             | Q247 <sup>MA</sup><br>D245               | Q247 <sup>MC</sup><br>L243 <sup>MA</sup> | D245 <sup>MA</sup><br>S359               | D245 <sup>MA</sup><br>D245               | D245 <sup>MC</sup><br>S246               | S246 <sup>MC</sup><br>L243 <sup>MC</sup> |
| PvPMX/WM382   | Q212<br>D323 <sup>MC</sup> | Q212<br>D210                             | Q212<br>D210                             | Q212 <sup>MA</sup><br>D210               | Q212 <sup>MC</sup><br>L208 <sup>MA</sup> | S211<br>D210 <sup>MC</sup>               | S211 <sup>MA</sup><br>L208 <sup>MC</sup> | D210<br>D323 <sup>MC</sup>               |
| PvPMX/WM4     | Q212<br>D323 <sup>MC</sup> | Q212<br>D210                             | Q212 <sup>MA</sup><br>D210               | Q212 <sup>MC</sup><br>L208 <sup>MA</sup> | S211<br>D210 <sup>MC</sup>               | S211 <sup>MA</sup><br>L208 <sup>MC</sup> | Nil                                      | Nil                                      |

# Amino Acid interaction with side chain function  
MA interaction with main chain amide  
MC interaction with main chain carbonyl
